# Supplementary material
Source: publisher figshare collection journal article supplement (https://acs.figshare.com/ndownloader/files/22034352)
Supplement: Supplementary file 1 [file 22034352]

Synergistic chemotherapy for breast cancer and breast cancer brain metastases via  
paclitaxel-loaded oleanolic acid nanoparticles

Youmei Bao <sup>a</sup>, Shenqi Zhang <sup>b</sup>, Zeming Chen <sup>b</sup>, Ann T. Chen <sup>c</sup>, Junning Ma <sup>b</sup>, Gang  
Deng <sup>b</sup>, Weiguo Xu <sup>d</sup>, Jiangbing Zhou <sup>b,c</sup>, Zhi-Qiang Yu <sup>a</sup>, Guangyu Yao <sup>e,\*</sup>, Jianjun  
Chen <sup>a,\*</sup>

<sup>a</sup> School of Pharmaceutical Sciences, Southern Medical University, 1838 Shatai Road,  
Guangzhou 510515, P. R. China

<sup>b</sup> Department of Neurosurgery, Yale University, 333 Cedar Street, New Haven 06510,  
United States

<sup>c</sup> Department of Biomedical Engineering, Yale University, 333 Cedar Street, New  
Haven 06510, United States

<sup>d</sup> Key Laboratory of Polymer Ecomaterials, Changchun Institute of Applied  
Chemistry, Chinese Academy of Sciences, 5625 Renmin Street, Changchun 130022,  
P. R. China

<sup>e</sup> Breast Center, Nanfang Hospital, Southern Medical University, 1838 Shatai Road,  
Guangzhou 510515, P. R. China

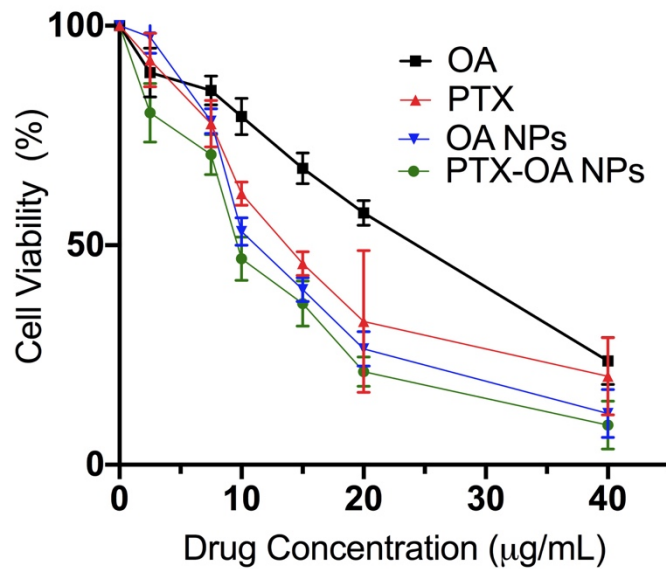

**Figure S1.** Cell viability of MCF-7 cells after treatments with free OA (black line), free PTX (red line), blank OA NPs (blue line), and PTX-OA NPs (green line), respectively, in different drug concentrations (each group included 3 wells).

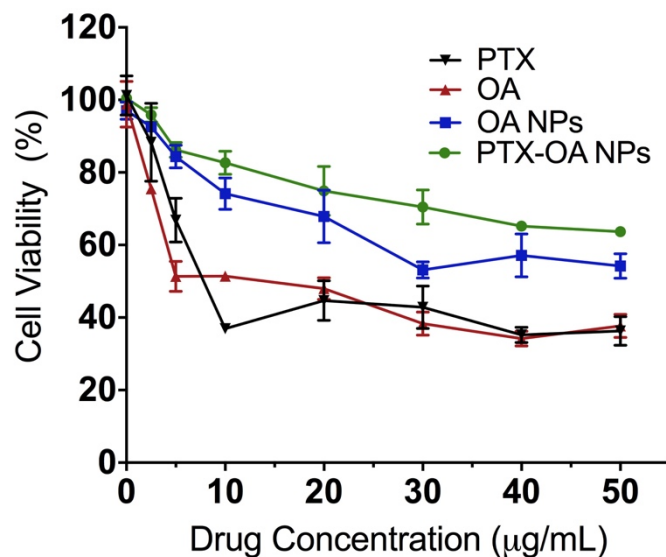

**Figure S2.** Cell viability of NHA cells after treatments with free PTX (black line), OA (red line), blank OA NPs (blue line), and PTX-OA NPs (green line), respectively, in different drug concentrations (each group included 3 wells).

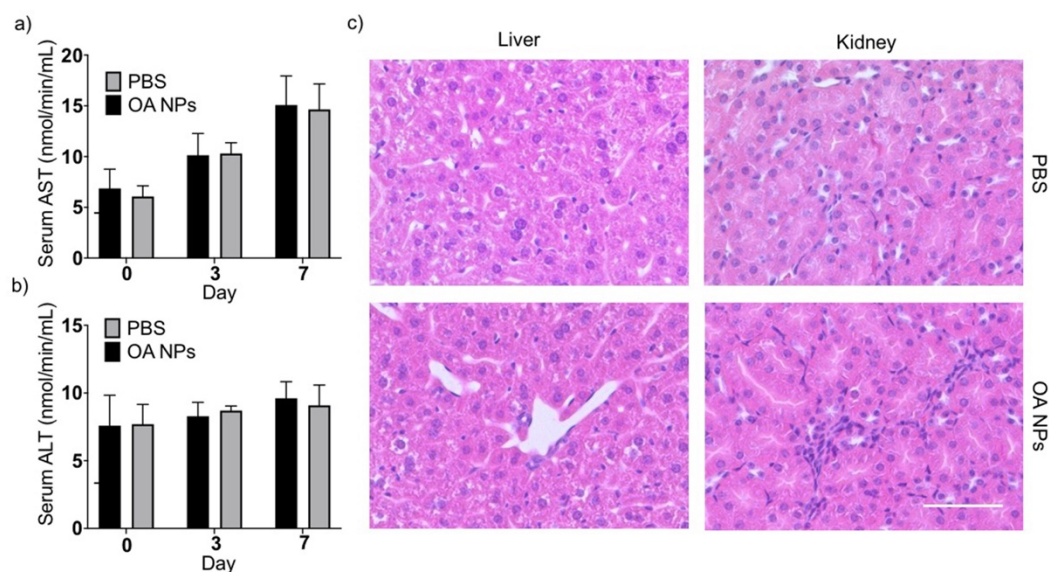

**Figure S3.** Evaluation of systemic toxicity of OA NPs. Intravenous administration of OA NPs did not induce significant hepatotoxicity based on AST test (a) and ALT test (b); (c) Representative images of H&E staining of liver and kidney isolated from mice received treatment of PBS and OA NPs. Scale bar: 100  $\mu$ m.

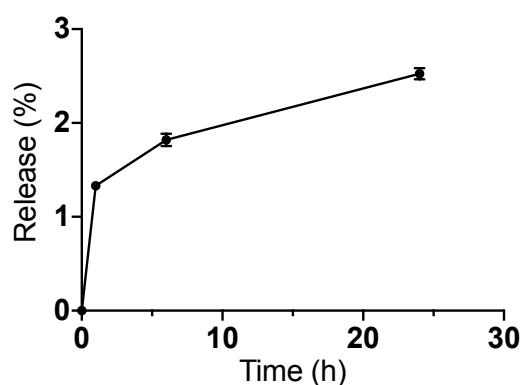

**Figure S4.** Release of IR780 from IR780-loaded OA NPs (IR780-OA NPs) in PBS (pH = 7.4) over the first 24 hours (n = 3).

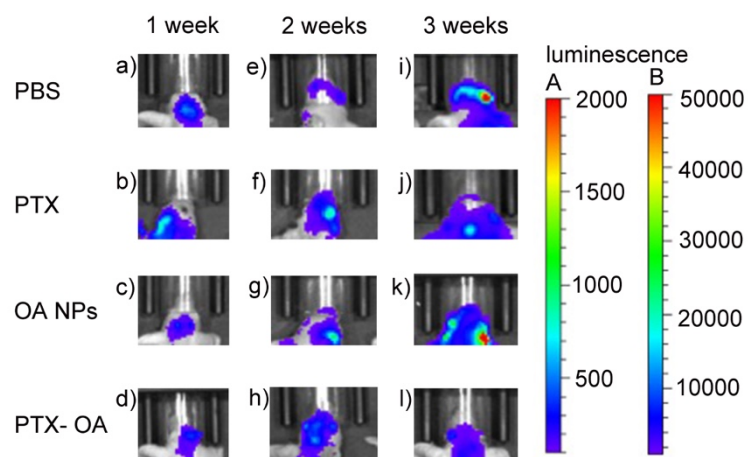

**Figure S5.** Representative IVIS images of BCBMs progression under different treatments. Scale A was for images a)-d) and h). Scale B was for images e)-g) and i)-l).

**Table S1** Combination cell inhibitory effect of PTX and OA NPs in PTX-OA NPs on MDA-MB-231-WT cells

| IC <sub>x</sub> | PTX   | OA NPs | PTX-OA NPs | CI   |
|-----------------|-------|--------|------------|------|
| x = 25          | 5.69  | 5.64   | 3.92       | 0.69 |
| x = 50          | 10.84 | 15.11  | 8.14       | 0.58 |
| x = 75          | 17.36 | 30.98  | 14.43      | 0.53 |

The combination indices were calculated by the following formula:  $CI = [C'_{x, PTX} / C_{x, PTX}] + [C'_{x, OA\ NPs} / C_{x, OA\ NPs}]$ , where,  $C_{x, PTX}$ : concentration of PTX with x% cell inhibition in PTX only group;  $C_{x, OA\ NPs}$ : concentration of OA NPs with x% cell inhibition in OA NPs only group;  $C'_{x, PTX}$ : concentration of PTX with x% cell inhibition in PTX-OA NPs combination group;  $C'_{x, OA\ NPs}$ : concentration of OA NPs with x% cell inhibition in PTX-OA NPs combination group.

**Table S2** Combination cell inhibitory effect of PTX and OA NPs in PTX-OA NPs on MCF-7 cells

| IC <sub>x</sub> | PTX   | OA NPs | PTX-OA NPs | CI   |
|-----------------|-------|--------|------------|------|
| x = 25          | 7.92  | 7.82   | 5.21       | 0.66 |
| x = 50          | 13.68 | 11.19  | 9.68       | 0.84 |
| x = 75          | 32.21 | 21.88  | 18.77      | 0.81 |

The combination indices were calculated by the following formula:  $CI = [C'_{x, PTX} / C_{x, PTX}] + [C'_{x, OA\ NPs} / C_{x, OA\ NPs}]$ , where,  $C_{x, PTX}$ : concentration of PTX with x% cell inhibition in PTX only group;  $C_{x, OA\ NPs}$ : concentration of OA NPs with x% cell inhibition in OA NPs only group;  $C'_{x, PTX}$ : concentration of PTX with x% cell inhibition in PTX-OA NPs combination group;  $C'_{x, OA\ NPs}$ : concentration of OA NPs with x% cell inhibition in PTX-OA NPs combination group.
